# Supplementary material
Source: PubMed Central journal article supplement (PMC5003325)
Supplement: NIHMS784820-supplement-1.pdf [file NIHMS784820-supplement-1.pdf]

## **Supplementary Information**

### **Flavivirus NS1 protein in infected host sera enhances viral acquisition by mosquitoes**

Jiaying Liu, Yang Liu, Kaixiao Nie, Senyan Du, Jingjun Qiu, Xiaojing Pang,

Penghua Wang, Gong Cheng

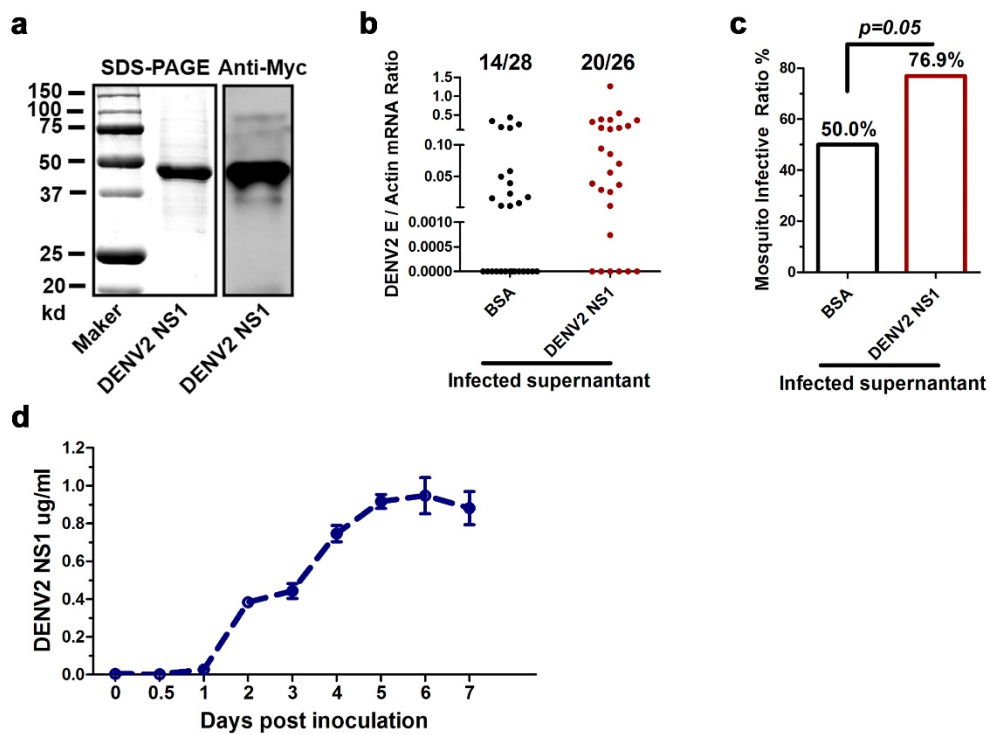

**Supplementary Figure 1. Recombinant DENV2 sNS1 increased DENV2 acquisition by *A. aegypti*, and measuring concentration of sNS1 in the supernatant of DENV2-infected Vero cells.**

(a) Purification of DENV2 sNS1 protein from a *Drosophila S2* expression system. The DENV2 NS1 gene was cloned into a pMT/BiP/N-myc-His-A DNA vector. Recombinant DENV2 NS1 was expressed and purified on a Cobalt-His column (Left panel). Protein expression was evaluated using an anti-myc mAb (Right panel).

(b,c) Recombinant DENV2 sNS1 increased DENV2 acquisition by *A. aegypti*. Recombinant DENV2 sNS1 protein was expressed and purified using the *Drosophila S2* expression system. Following this, 10  $\mu\text{g}$  of purified sNS1 was incubated with fresh human blood (500  $\mu\text{l}$ ) and DENV2 in the supernatant of Vero cells (500  $\mu\text{l}$ ) to feed *A. aegypti* via an *in vitro* membrane blood meal. A concentration of  $1 \times 10^6$  pfu/ml DENV2 was used for mosquito oral infection. Mosquitoes fed an equivalent quantity of BSA served as negative controls. Mosquito infectivity was determined by TaqMan qPCR at 8 days post blood meal. (b) The number of infected mosquitoes relative to total mosquitoes is shown at the top of each column. Each dot represents a mosquito. (c) The data are represented as the percentage of mosquito infection. Differences in

mosquito infective ratios were compared using Fisher's exact test.

**(d)** Concentration of the DENV2 sNS1 was detected in the supernatant of DENV2-infected Vero cells by ELISA. The values in the graph represent the mean  $\pm$  SEM.

**(a-d)** The DENV2 NGC strain was used to infect Vero cells. The experiments were biologically reproduced at least 3 times.

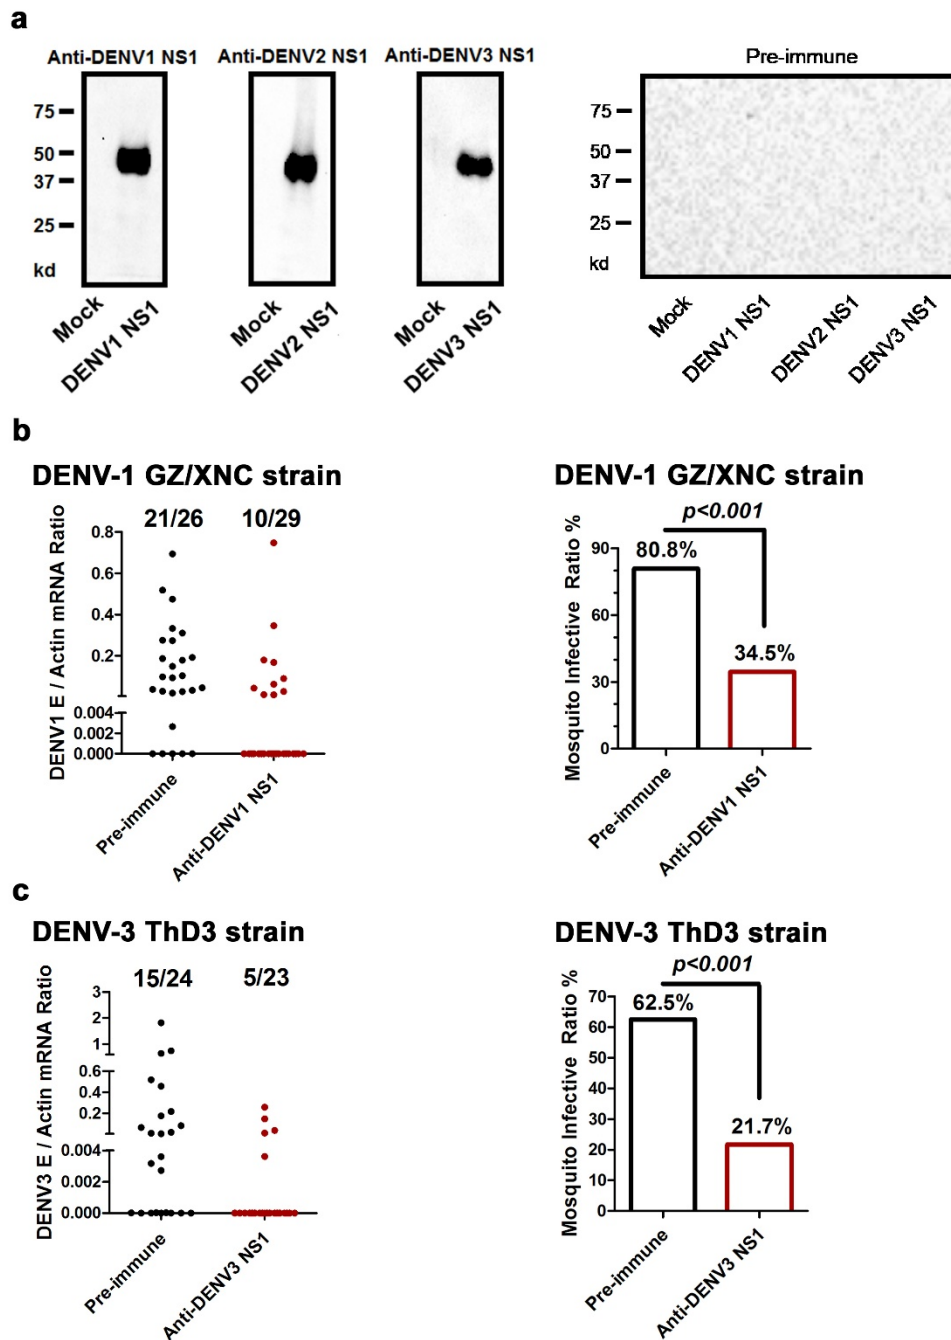

**Supplementary Figure 2. Immunoblockade of sNS1 in infected supernatant reduced DENV acquisition by *A. aegypti*.**

(a) Generation of murine polyclonal antibodies against the NS1s of different DENV serotypes. The *NS1* genes of three DENV serotypes were cloned into a pET-28a (+) expression vector and expressed in *E. coli* BL21 DE3. The recombinant proteins, expressed in inclusion bodies, were dissolved in 8 M urea and purified using a Cobalt-His column for

antibody generation. The antibodies were validated by immunostaining with S2-expressed correlated NS1 proteins.

**(b,c)** Immunoblockade of DENV1 NS1 **(b)** and DENV3 NS1 **(c)** in infected Vero supernatant reduced DENV acquisition. An aliquot of 10  $\mu$ l antisera against DENV1 NS1 (GZ/XNC strain) or DENV3 NS1 (ThD3 strain) was mixed with supernatant from corresponding DENV-infected Vero cells (500  $\mu$ l) and with fresh human blood (500  $\mu$ l) for *in vitro* membrane feeding by *A. aegypti*. Both  $1 \times 10^6$  pfu/ml DENV1 and  $1 \times 10^6$  pfu/ml DENV3 were used for mosquito oral infection. An equivalent quantity of pre-immune serum served as a mock control. Mosquito infectivity was determined by TaqMan qPCR at 8 days post blood meal. The number of infected mosquitoes relative to total mosquitoes is shown at the top of each column (Left panel). Each dot represents a mosquito. The data are represented as the percentage of mosquito infection. Differences in mosquito infective ratios were compared using Fisher's exact test (Right panel).

**(a-c)** The experiments were biologically repeated 3 times with similar results.

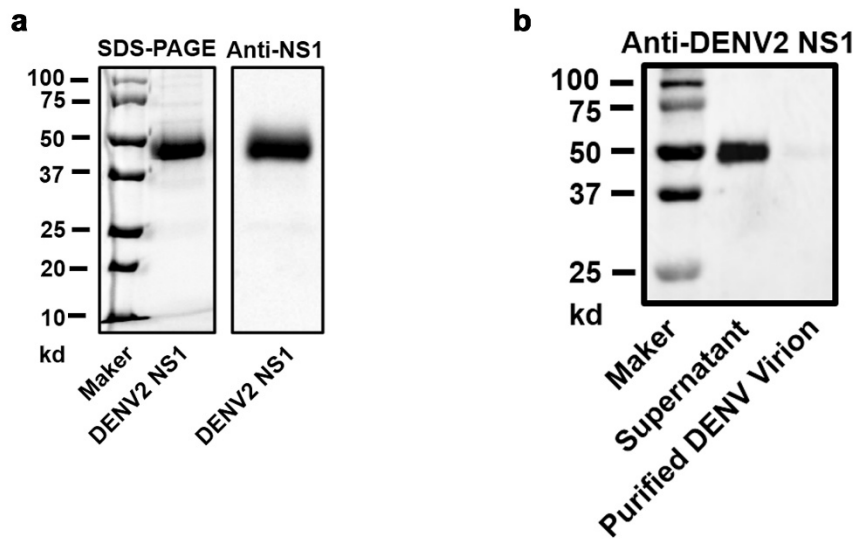

**Supplementary Figure 3. Purification of infectious DENV2 particles and native sNS1 protein from supernatant of DENV2-infected Vero cells.**

**(a)** Purification of native DENV2 sNS1. Purified polyclonal antibodies were coupled to cyanogen bromide-activated Sepharose 4B beads for affinity purification. Native sNS1 was isolated from the supernatant of DENV2-infected Vero cells at 5 days post infection. The quality of the purified native DENV2 sNS1 was assessed via SDS-PAGE and western blotting.

**(b)** Removal of sNS1 from purified DENV2 virions. Vero cells were infected with DENV2 (NGC strain) for 5 days, and supernatant from the infected cells was subsequently collected to isolate infectious particles via high-speed centrifugation. Removal of the NS1 protein from the purified DENV2 particles was determined by western blotting using an anti-DENV2 NS1 antibody.

**(a,b)** The experiments were biologically repeated 3 times with similar results.

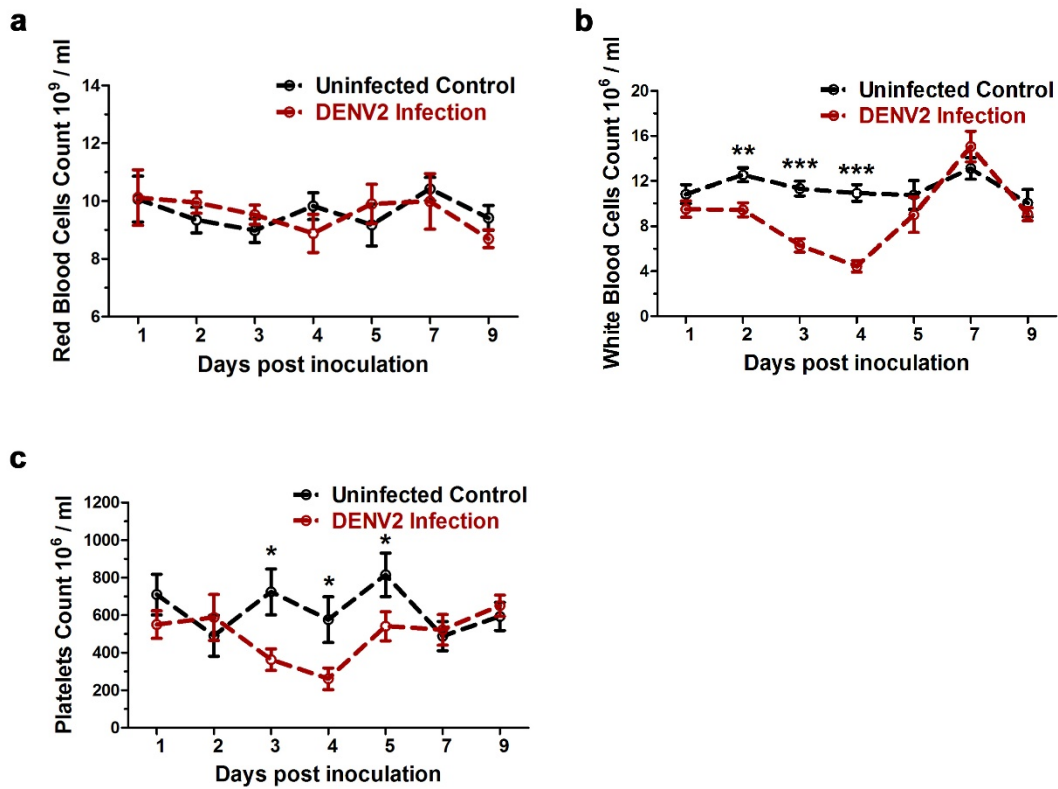

**Supplementary Figure 4. DENV2 infection produces leukopenia and thrombocytopenia in AG6 mice.**

(a-c) Blood from DENV2 infected and uninfected AG6 mice was daily collected for counting red blood cells (a), white blood cells (b), and platelets (c) using a hemocytometer. The DENV2 43 strain was used for animal infections. The data are representative of at least five AG6 mice. The values in the graph represent the mean  $\pm$  SEM. A non-parametric Mann-Whitney test was used to determine significant differences. "\*", "\*\*\*" and "\*\*\*\*" represent  $p < 0.05$ ,  $p < 0.01$ , and  $p < 0.001$ , respectively. The experiment was biologically reproduced at least 3 times.

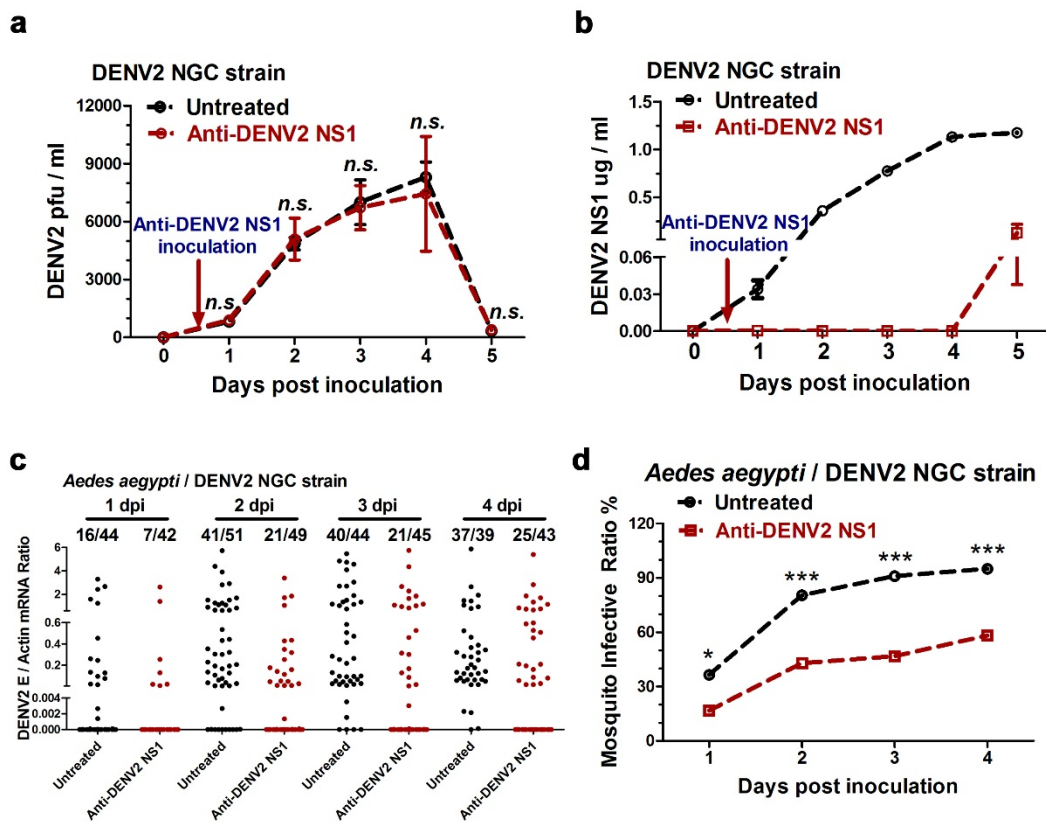

**Supplementary Figure 5. Immunoblockade of sNS1 in the infected AG6 mice prevents acquisition of the DENV2 NGC strain by *A. aegypti*.**

(a,b) Infection of AG6 mice with DENV2 NGC. AG6 mice were immunized and infected with the DENV2 NGC strain following the same procedure as shown in Fig.2a. (a) Detection of DENV2 viremia in the blood of infected AG6 mice. Blood was collected from the tail veins of infected mice from 0 to 5 days post infection. The presence of infectious viral particles in the blood plasma was assessed using a plaque assay. (b) Measurement of DENV2 sNS1 concentration. Mouse sera were used to measure the amounts of DENV2 sNS1 from 0 to 5 days post infection by ELISA. (a,b) The data are representative of at least five infected AG6 mice. The values in the graph represent the mean  $\pm$  SEM. A non-parametric Mann-Whitney test was used to determine significant differences.

(c,d) Immunoblockade of sNS1 prevents acquisition of the DENV2 NGC strain by *A. aegypti*. The fed mosquitoes were reared for an additional 8 days for DENV detection by TaqMan



qPCR. **(c)** The number of infected mosquitoes relative to total mosquitoes is shown at the top of each column. Each dot represents a mosquito. **(d)** The data are represented as the percentage of mosquito infection. Differences in mosquito infective ratios were compared using Fisher's exact test. "\*", "\*\*" and "\*\*\*" represent  $p < 0.05$ ,  $p < 0.01$ , and  $p < 0.001$ , respectively.

**(a-d)** The experiments were biologically reproduced at least 3 times.

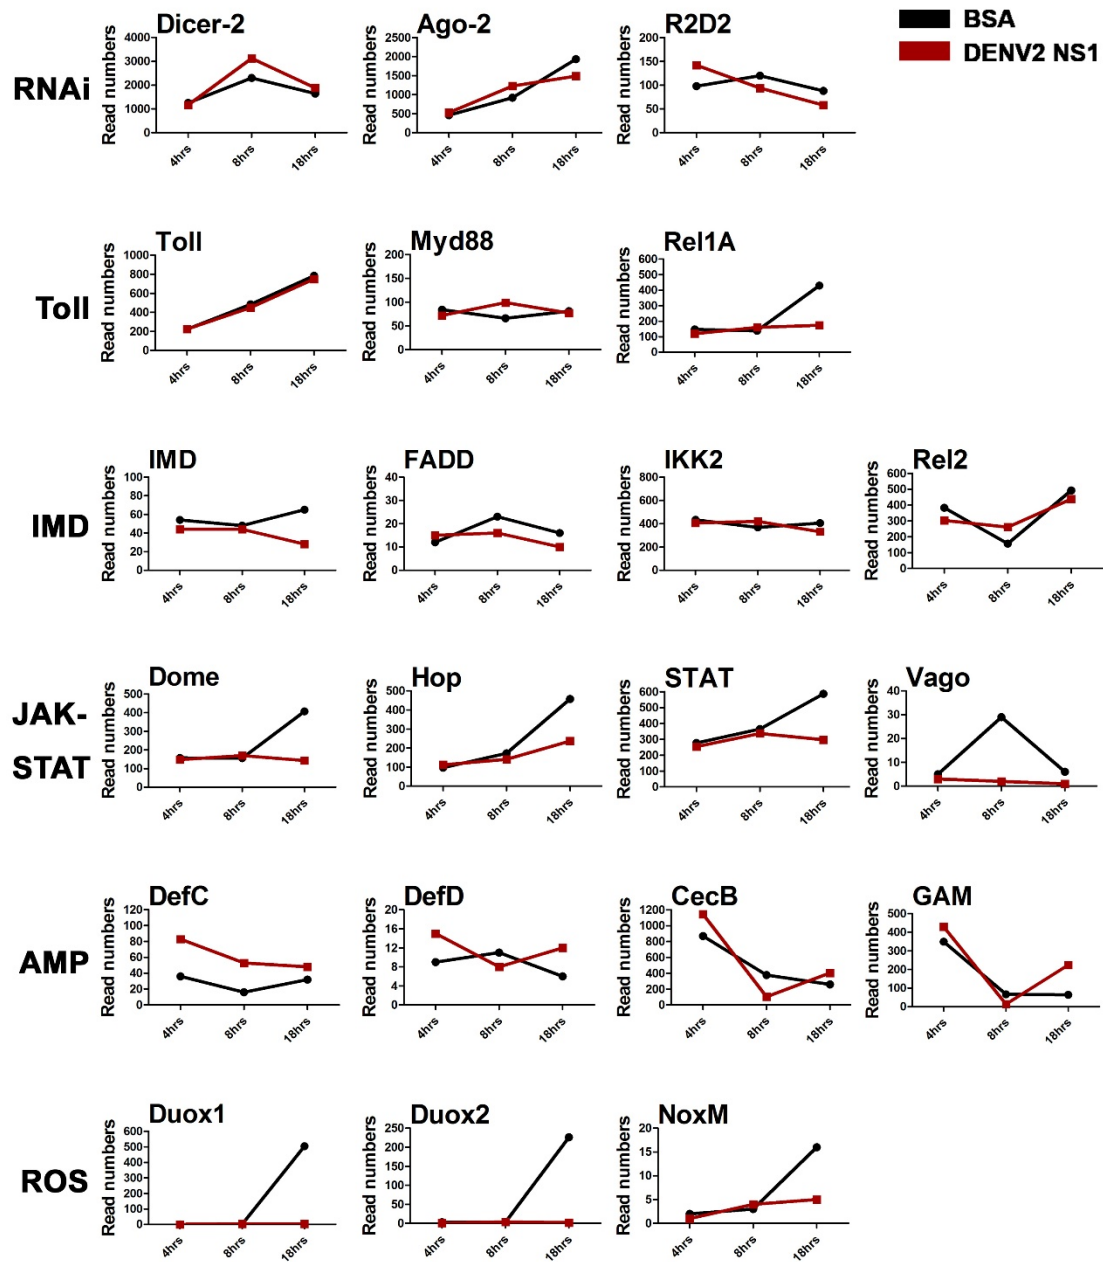

**Supplementary Figure 6. Regulation of immune-related genes in the midguts of mosquitoes feeding DENV2 sNS1.**

Read numbers of immune-related genes were extracted from the RNA-Seq data in **Supplementary Table 1**. Gene regulation is presented based on categorized immune pathways and factors.

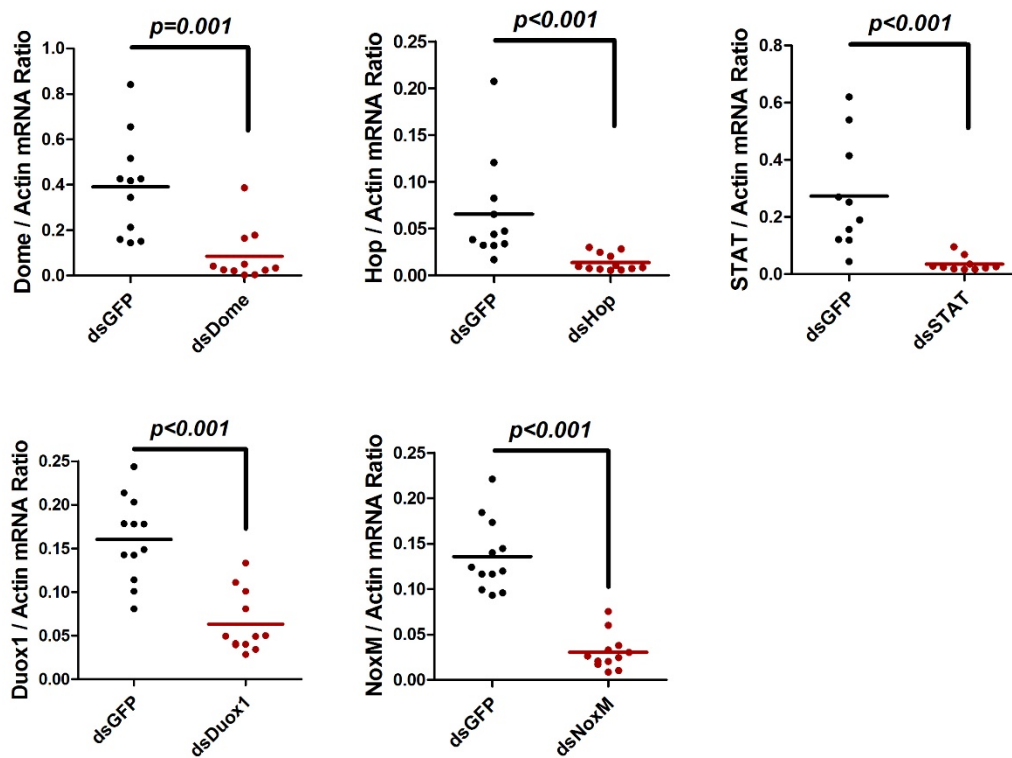

**Supplementary Figure 7. dsRNA-mediated knockdown of immune genes in *A. aegypti*.**

Genes encoding proteins in the JAK-STAT pathway and ROS system, which were suppressed in the mosquito midgut following feeding with DENV2 sNS1, were silenced by dsRNA inoculation in *A. aegypti*. GFP dsRNA served as a mock control. The expression levels of these immune-related genes were determined by qPCR and normalized against *A. aegypti actin* (AAEL011197). The qPCR primers are shown in **Supplementary Table 2**. The data are representative of at least three independent trials. The values in the graph represent the mean  $\pm$  SEM. A non-parametric Mann-Whitney test was performed to determine significant differences.

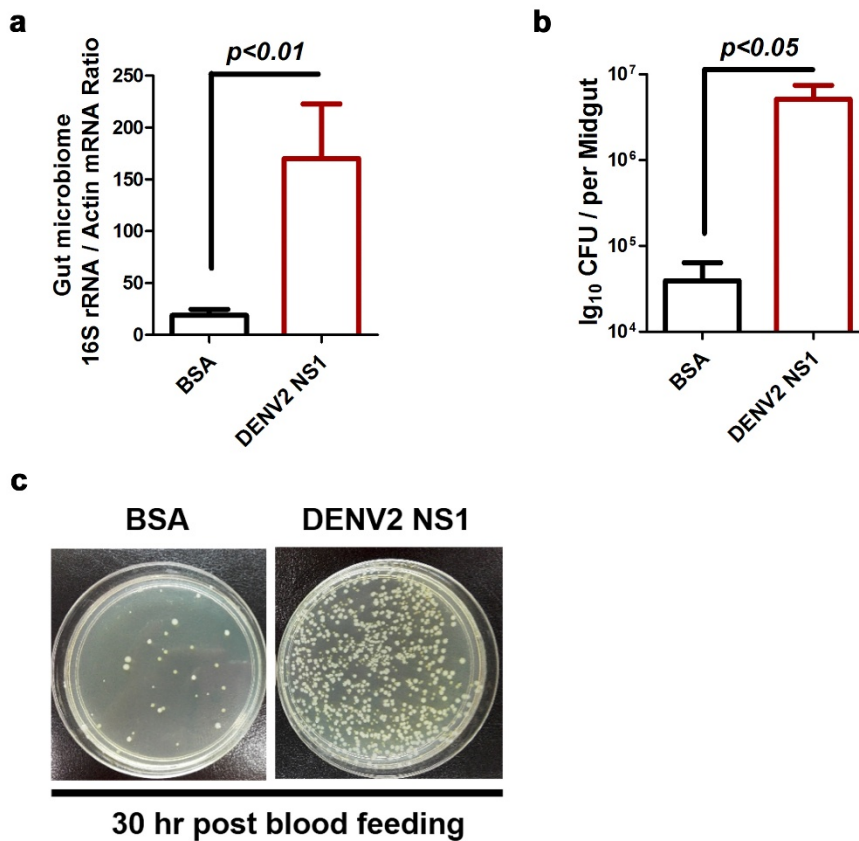

**Supplementary Figure 8. Feeding DENV2 sNS1 increased the burden of commensal bacteria in the mosquito midgut.**

(a,b) The midguts of mosquitoes fed either 10 µg/ml DENV2 sNS1 or BSA were separately dissected at 30 hr post blood feeding. The burden of commensal bacteria was determined by qPCR either using a pair of universal bacterial primers (a) or a colony-forming units (CFU) assay (b). The data are representative of at least three independent trials. The values in the graph represent the mean ± SEM. A non-parametric Mann-Whitney test was used to determine significant differences.

(c) Culturable commensal bacteria were counted on LB agar plates. Lysates of mosquito midguts were diluted 1000 times in PBS for counting in 90 mm petri dishes.

(a-c) The data are representative of at least three independent trials.

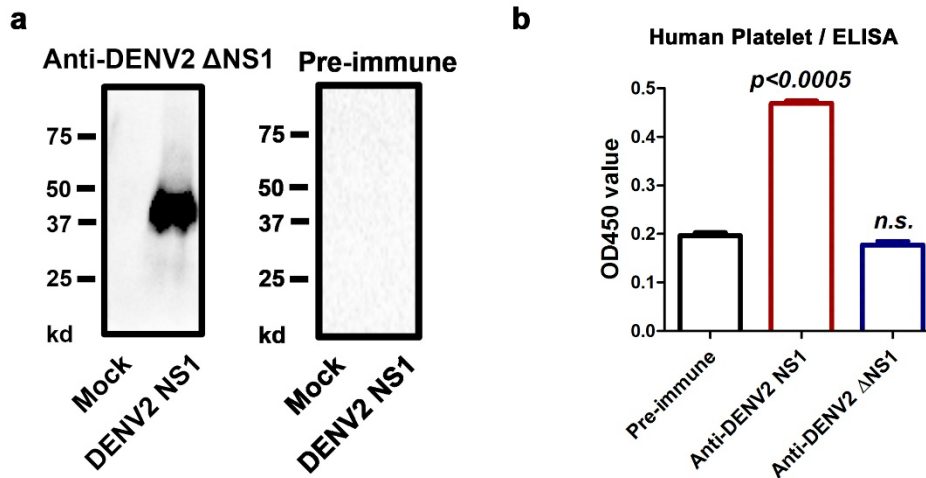

**Supplementary Figure 9. An antibody generated against DENV2 ΔNS1 does not cross-react with human primary platelet cells.**

**(a)** DENV2 ΔNS1 remains antigenic activity. Murine antibodies generated against DENV2 ΔNS1 can efficiently recognize S2-expressed, full-length DENV2 NS1 protein during western blotting. Supernatant from empty vector-transfected S2 cells was used as a mock control.

**(b)** Attachment of antibodies to DENV2 full-length NS1 or DENV2 ΔNS1 in human primary platelet cells. Purified antibodies against DENV2 full-length NS1 or ΔNS1 were incubated with human platelets. A pre-immune antibody served as a mock control. Antibody attachment to human platelets was analyzed by ELISA. The values in the graph represent the mean  $\pm$  SEM. A non-parametric Mann-Whitney test was used for significant analysis. The  $p$  values were adjusted using Bonferroni correction to account for multiple comparisons. Differences were considered significant if  $p < 0.025$ .

**(a,b)**The experiments were biologically repeated 3 times with similar results.

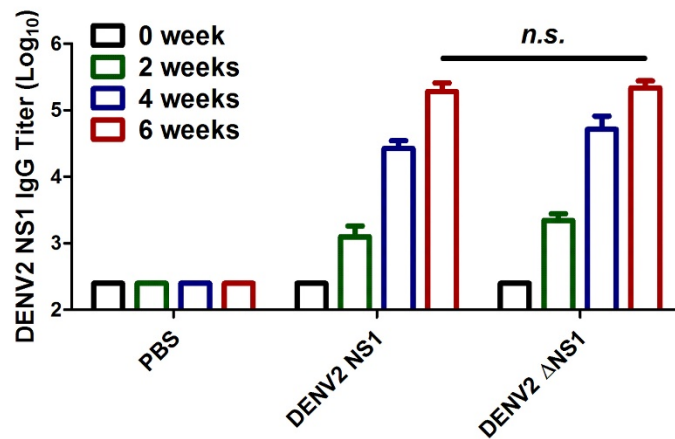

**Supplementary Figure 10. Titration of DENV2 NS1-specific antibodies in immunized AG6 mice.**

Immunized and control mice were bled in the 0th, 2nd, 4th and 6th week after the first immunization. NS1-specific antibodies were titrated by ELISA using purified recombinant DENV2 NS1 protein. The titer was determined at least 5 immunized AG6 mice. The values in the graph represent the mean  $\pm$  SEM. A non-parametric Mann-Whitney test was used to determine significant differences. The experiment was biologically repeated 3 times with similar result.

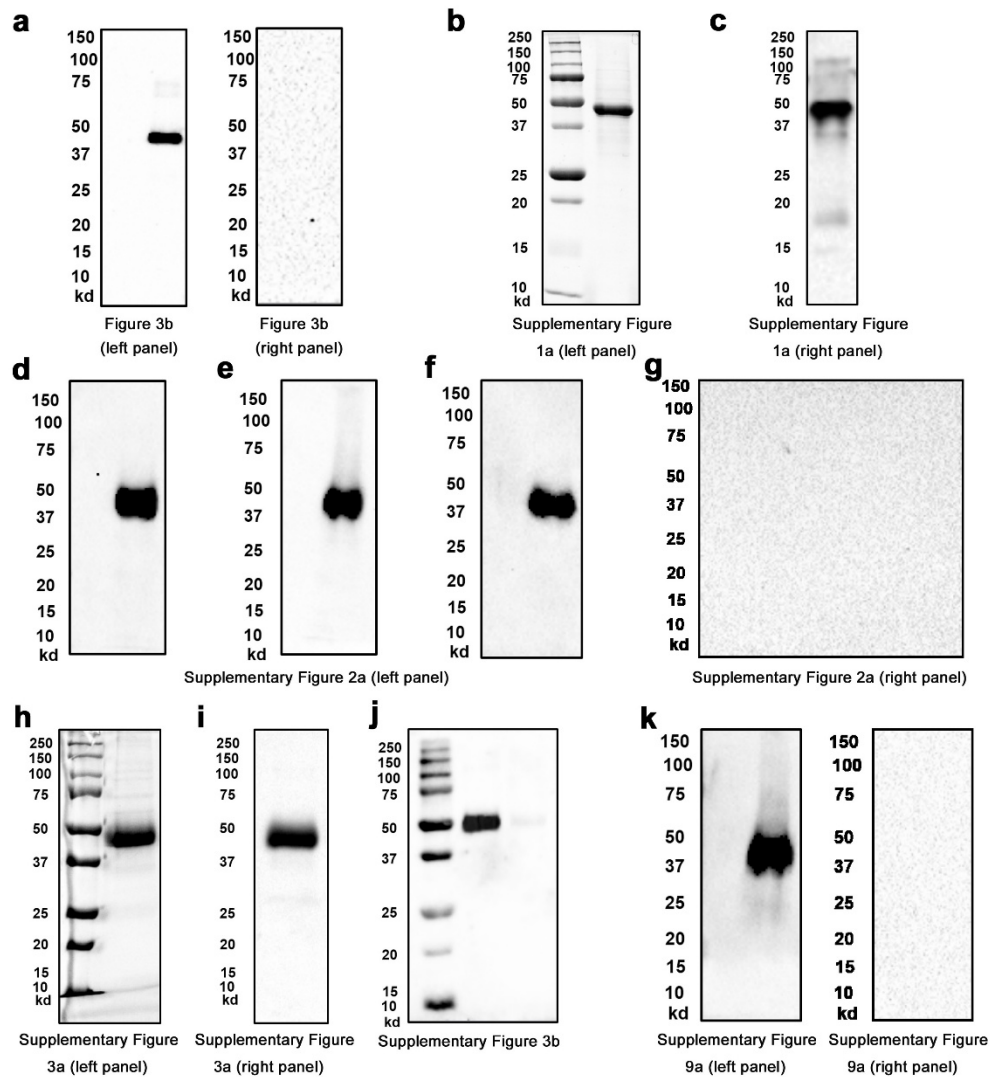

**Supplementary Figure 11. Full-length blots from Figure 3 and Supplementary Figure 1, 2, 3, 9.**

(a) Production of murine polyclonal antibodies against JEV NS1. (b,c) Purification of DENV2 sNS1 protein from a *Drosophila* S2 expression system. (d-g) Generation of murine polyclonal antibodies against the NS1s of different DENV serotypes. (h,i) Purification of native DENV2 sNS1. (j) Removal of sNS1 from purified DENV2 virions. (k) Generation of murine polyclonal antibodies against DENV 2 ΔNS1.

**Supplementary Table 1. Regulation of immune genes in the midgut of DENV2 NS1 fed *A. aegypti*.**

| Gene ID    | Gene Name | Function Group   | Log <sub>2</sub> Ratio |       |       |
|------------|-----------|------------------|------------------------|-------|-------|
|            |           |                  | 4 hr                   | 8 hr  | 18 hr |
| AAEL001612 | Dicer-1   | RNA interference | 0.11                   | 0.38  | -1.94 |
| AAEL006794 | Dicer-2   | RNA interference | -0.14                  | 0.51  | 0.41  |
| AAEL012410 | Ago-1     | RNA interference | -0.37                  | 0.34  | -1.26 |
| AAEL017251 | Ago-2     | RNA interference | 0.16                   | 0.49  | -0.16 |
| AAEL011753 | R2D2      | RNA interference | 0.50                   | -0.28 | -0.39 |
| AAEL008592 | Drosha    | RNA interference | 0.20                   | 0.17  | -1.21 |
| AAEL008687 | Loq       | RNA interference | -0.40                  | 0.59  | -0.70 |
| AAEL000709 | CACT      | Toll pathway     | 0.31                   | 0.00  | -0.21 |
| AAEL007768 | MYD       | Toll pathway     | 0.20                   | 0.24  | 0.44  |
| AAEL006571 | Pelle     | Toll pathway     | 0.55                   | -0.45 | -0.73 |
| AAEL007696 | Rel1A     | Toll pathway     | -0.34                  | 0.28  | -1.10 |
| AAEL015018 | Toll      | Toll pathway     | -0.02                  | -0.03 | 0.15  |
| AAEL009551 | Toll11    | Toll pathway     | 0.29                   | -1.93 | -0.46 |
| AAEL007613 | Toll1A    | Toll pathway     | -2.36                  | -0.71 | -3.19 |
| AAEL017523 | Toll4     | Toll pathway     | 0.55                   | -1.15 | -1.68 |
| AAEL007619 | Toll5A    | Toll pathway     | -0.56                  | -0.35 | -0.59 |
| AAEL000057 | Toll5B    | Toll pathway     | -0.04                  | 0.74  | 0.40  |
| AAEL002583 | Toll7     | Toll pathway     | -0.09                  | -0.19 | 0.54  |
| AAEL013441 | Toll9A    | Toll pathway     | -0.14                  | -0.08 | 0.42  |
| AAEL011734 | Toll9B    | Toll pathway     | -0.40                  | 0.22  | 0.16  |
| AAEL011363 | Traf6     | Toll pathway     | -0.02                  | 0.46  | 0.38  |
| AAEL007642 | Tube      | Toll pathway     | -1.04                  | 0.09  | -0.71 |
| AAEL006212 |           | Toll pathway     | N/A                    | -0.11 | 0.09  |
| AAEL009474 | PGRPS1    | Toll pathway     | 2.46                   | -0.56 | 0.09  |
| AAEL017056 | PGRPS4    | Toll pathway     | 0.97                   | 0.76  | 0.01  |
| AAEL009176 | GNBPB3    | Toll pathway     | 3.44                   | -4.36 | 0.39  |
| AAEL009178 | GNBPB4    | Toll pathway     | -2.36                  | 2.17  | -0.79 |
| AAEL007897 | Spz4      | Toll pathway     | -5.56                  | -1.07 | -0.52 |
| AAEL001929 | Spz5      | Toll pathway     | -3.46                  | -0.15 | 0.80  |
| AAEL013434 |           | Toll pathway     | -1.26                  | 1.49  | -0.11 |
| AAEL007624 | Rel2      | IMD pathway      | -0.37                  | 0.81  | 0.05  |
| AAEL001932 | FADD      | IMD pathway      | 0.29                   | -0.45 | -0.46 |
| AAEL003245 | IKK1      | IMD pathway      | -0.13                  | -0.49 | -0.17 |
| AAEL012510 | IKK2      | IMD pathway      | -0.13                  | 0.26  | -0.08 |
| AAEL010083 | IMD       | IMD pathway      | -0.33                  | -0.05 | -1.00 |
| AAEL012380 | PGRPLA    | IMD pathway      | -0.04                  | -0.21 | 0.13  |
| AAEL010171 | PGRPLB    | IMD pathway      | 1.01                   | 0.16  | 0.02  |
| AAEL014640 | PGRPLC    | IMD pathway      | -0.38                  | 0.05  | 0.62  |
| AAEL013112 | PGRPLE    | IMD pathway      | 0.42                   | -0.76 | -0.14 |
| AAEL012471 | Dome      | JAK-STAT pathway | -0.12                  | 0.20  | -1.30 |



|            |          |                              |       |       |       |
|------------|----------|------------------------------|-------|-------|-------|
| AAEL009692 | STAT     | JAK-STAT pathway             | -0.16 | -0.04 | -0.77 |
| AAEL012553 | Hop      | JAK-STAT pathway             | 0.17  | -0.22 | -0.74 |
| AAEL000200 | Vago     | JAK-STAT pathway             | 0.97  | -8.65 | -5.19 |
| AAEL000165 | Vago     | JAK-STAT pathway             | -2.04 | -2.74 | -2.11 |
| AAEL018117 | Vir-1    | JAK-STAT pathway             | 0.47  | 0.17  | -0.12 |
| AAEL007563 | Duox1    | ROS                          | N/A   | 2.07  | -6.76 |
| AAEL007562 | Duox2    | ROS                          | -1.62 | 0.49  | -6.61 |
| AAEL010179 | NoxM     | ROS                          | -1.04 | 0.49  | -1.46 |
| AAEL004223 | CecB     | Anti-microbial peptide       | 0.36  | -1.82 | 0.86  |
| AAEL017211 | CecH     | Anti-microbial peptide       | 0.46  | -1.98 | 1.66  |
| AAEL003841 | DefA     | Anti-microbial peptide       | 0.97  | 2.07  | -0.71 |
| AAEL003832 | DefC     | Anti-microbial peptide       | 1.17  | 1.80  | 0.80  |
| AAEL003857 | DefD     | Anti-microbial peptide       | 0.70  | -0.39 | 1.21  |
| AAEL004522 | GAM      | Anti-microbial peptide       | 0.26  | -2.19 | 2.02  |
| AAEL015308 | SCRAL1   | Scavenger Receptor           | -3.21 | 3.77  | -6.47 |
| AAEL009192 | SCRASP1  | Scavenger Receptor           | 5.03  | -5.87 | -6.18 |
| AAEL008370 | SCRB17   | Scavenger Receptor           | 0.04  | 0.56  | -0.25 |
| AAEL000234 | SCRB7    | Scavenger Receptor           | 0.00  | 0.15  | 0.22  |
| AAEL000227 | SCRB8    | Scavenger Receptor           | -0.05 | 0.21  | 0.10  |
| AAEL000256 | SCRB9    | Scavenger Receptor           | 0.97  | -0.08 | -0.11 |
| AAEL009420 | SCRBQ1   | Scavenger Receptor           | -0.33 | 0.13  | 0.12  |
| AAEL009423 | SCRBQ2   | Scavenger Receptor           | -0.11 | 0.22  | -0.05 |
| AAEL009432 | SCRBQ3   | Scavenger Receptor           | -0.04 | -0.13 | 0.22  |
| AAEL001914 |          | Scavenger Receptor           | -0.07 | 0.61  | 0.22  |
| AAEL000087 | TEP22    | Thioester-containing protein | -0.04 | -2.25 | -0.56 |
| AAEL001163 | TEP23    | Thioester-containing protein | 0.00  | 0.48  | 0.41  |
| AAEL001794 | TEP20    | Thioester-containing protein | -0.04 | -4.88 | -2.68 |
| AAEL012267 | TEP13    | Thioester-containing protein | -0.15 | 0.31  | -0.72 |
| AAEL014078 | SRPN     | Serine protease inhibitor    | -0.04 | -2.10 | -2.31 |
| AAEL007765 | SRPN10   | Serine protease inhibitor    | -0.39 | 0.13  | -0.01 |
| AAEL003686 | SRPN11   | Serine protease inhibitor    | -1.04 | -3.47 | -3.94 |
| AAEL002720 | SRPN20   | Serine protease inhibitor    | 0.48  | -2.58 | 1.02  |
| AAEL005665 | SRPN3    | Serine protease inhibitor    | 0.48  | -1.39 | -3.06 |
| AAEL013936 | SRPN4    | Serine protease inhibitor    | 0.92  | -2.92 | -2.59 |
| AAEL014141 | SRPN5    | Serine protease inhibitor    | 0.97  | 0.23  | -3.15 |
| AAEL010769 | SRPN6    | Serine protease inhibitor    | -0.04 | -5.92 | -1.18 |
| AAEL011777 | SRPN8    | Serine protease inhibitor    | -1.04 | -2.15 | -3.08 |
| AAEL008364 | SRPN9    | Serine protease inhibitor    | 0.42  | 0.22  | -4.05 |
| AAEL000074 | CLIPB1   | Clip-Domain Serine Protease  | -0.62 | -4.25 | -1.16 |
| AAEL003243 | CLIPB13A | Clip-Domain Serine Protease  | 0.97  | -6.07 | -5.16 |
| AAEL014349 | CLIPB15  | Clip-Domain Serine Protease  | 1.72  | 0.50  | -0.03 |
| AAEL008668 | CLIPB22  | Clip-Domain Serine Protease  | 1.84  | -0.46 | 0.68  |
| AAEL007993 | CLIPB27  | Clip-Domain Serine Protease  | -0.34 | -0.20 | 1.80  |
| AAEL006161 | CLIPB31  | Clip-Domain Serine Protease  | 0.82  | -0.57 | 0.35  |

|            |         |                             |       |       |       |
|------------|---------|-----------------------------|-------|-------|-------|
| AAEL000099 | CLIPB33 | Clip-Domain Serine Protease | -0.04 | -4.18 | 0.80  |
| AAEL000028 | CLIPB34 | Clip-Domain Serine Protease | 0.55  | -2.99 | -3.01 |
| AAEL006168 | CLIPB42 | Clip-Domain Serine Protease | 1.19  | -1.39 | 0.37  |
| AAEL005093 | CLIPB46 | Clip-Domain Serine Protease | -2.84 | 0.07  | -0.15 |
| AAEL005064 | CLIPB5  | Clip-Domain Serine Protease | 1.29  | -2.74 | -3.51 |
| AAEL000038 | CLIPB6  | Clip-Domain Serine Protease | 0.21  | -0.87 | -1.88 |
| AAEL003625 | CLIPB8  | Clip-Domain Serine Protease | 3.29  | -2.10 | -0.96 |
| AAEL011991 | CLIPC1  | Clip-Domain Serine Protease | -5.05 | -0.93 | -2.49 |
| AAEL012712 | CLIPC13 | Clip-Domain Serine Protease | -0.94 | 0.33  | -5.58 |
| AAEL012713 | CLIPC16 | Clip-Domain Serine Protease | 1.77  | -2.51 | -0.98 |
| AAEL007593 | CLIPC2  | Clip-Domain Serine Protease | 0.55  | -1.51 | -4.28 |
| AAEL002124 | CLIPD6  | Clip-Domain Serine Protease | -0.67 | -2.15 | -2.96 |
| AAEL015439 | CLIPD7  | Clip-Domain Serine Protease | -0.69 | 0.80  | -0.16 |
| AAEL009726 |         | Clip-Domain Serine Protease | -0.33 | -2.79 | 0.56  |
| AAEL009722 |         | Clip-Domain Serine Protease | -1.04 | -0.93 | -0.14 |

**Supplementary Table 2. Primers and probes for gene cloning and qPCR**

| <b>Primers for cloning into pET28a(+)</b>           |                                          |                                             |                                         |
|-----------------------------------------------------|------------------------------------------|---------------------------------------------|-----------------------------------------|
|                                                     | <b>Upper primer</b>                      | <b>Lower primer</b>                         |                                         |
| <i>DENV1 NS1</i> (His tag in both N and C-terminal) | GGGCTCCATATGGACTCGGGATGTGTA              | ATAAGAATGCGGCCGCTGCAGAGACCAATGA             |                                         |
| <i>DENV2 NS1</i> (His tag in both N and C-terminal) | GGCATCCATATGGATAGTGGTTGCGTTG             | TAATTCCTCGAGGGCTGTGACCAAGGA                 |                                         |
| <i>DENV3 NS1</i> (His tag in both N and C-terminal) | TACTCTAGCTAGCGACATGGGGTGTGTC             | GATTCGGCTCGAGCGCTGAGACTAAAGA                |                                         |
| <i>JEV NS1</i> (His tag in both N and C-terminal)   | TATCTAGCTAGCGACACTGGATGTGCC              | TAGCCCGCTCGAGTTCAACATTGAAAGC                |                                         |
| <b>Primers for cloning into pMT/BIP/Mye-His/A</b>   |                                          |                                             |                                         |
|                                                     | <b>Upper primer</b>                      | <b>Lower primer</b>                         |                                         |
| <i>DENV1 NS1</i> (Myc tag in N-terminal)            | TATTCGGGGGACTCGGGATGTGTA                 | ATTTCGGCCGCTGCAGAGACCAATGA                  |                                         |
| <i>DENV2 NS1</i> (Myc tag in N-terminal)            | TCTCGGGTACTGATAGTGGTTGCGTT               | TATTACGCTCGAGAAGCTGTGACCAAGGAG              |                                         |
| <i>DENV3 NS1</i> (Myc tag in N-terminal)            | ATAATAATGCGGCCGACATGGGGTGTGTC            | TACTCCCGCGCGCTGAGACTAAAGA                   |                                         |
| <i>JEV NS1</i> (Myc tag in N-terminal)              | TATCGGGTACTGACACTGGATGTGCC               | TATCCGCTCGAGTTTCAACATTGAAAGC                |                                         |
| <b>The primers for double-strand RNA synthesis</b>  |                                          |                                             |                                         |
|                                                     | <b>Upper primer</b>                      | <b>Lower primer</b>                         |                                         |
| dsRNA GFP                                           | TAATACGACTCACTATAGGGGTGAGCAAGGGCGAGGAG   | TAATACGACTCACTATAGGGCATGATATAGACGTGTGGCTGTT |                                         |
| dsRNA Dome                                          | TAATACGACTCACTATAGGGCCATCTCCACCACGAAACTT | TAATACGACTCACTATAGGGCCGGTGGTTGCCATATAATC    |                                         |
| dsRNA Hop                                           | TAATACGACTCACTATAGGGGTAACCCCATCTGTCTC    | TAATACGACTCACTATAGGGTGTGGCATTTCCCGGCAT      |                                         |
| dsRNA STAT                                          | TAATACGACTCACTATAGGGTGAATACCAAGGACAAAT   | TAATACGACTCACTATAGGGTGCACCACTCAAAGCTTGA     |                                         |
| dsRNA Duox1                                         | TAATACGACTCACTATAGGGGGTGAACACACAGATCTTAG | TAATACGACTCACTATAGGGGAGTGCACAACCGGAATAT     |                                         |
| dsRNA Noxm                                          | TAATACGACTCACTATAGGGGTGGTGTATCCATAGCATAG | TAATACGACTCACTATAGGGTCTCTCACTGCAATAGCC      |                                         |
| <b>The primers for SYBR Green RT-QPCR</b>           |                                          |                                             |                                         |
|                                                     | <b>Upper primer</b>                      | <b>Lower primer</b>                         |                                         |
| SYBR Dicer-2                                        | CGCTCGCTTTGGTGAAT                        | TGCCGACTTCGCCAGGAT                          |                                         |
| SYBR Ago-2                                          | CCTCGTGGCAACGTAATG                       | TGATCCGGGTGTTCTTGTT                         |                                         |
| SYBR R2D2                                           | GAAAGGGCTGACGATATTGA                     | CCCAGCTTCGGTCACTTA                          |                                         |
| SYBR Toll                                           | TGGATGGAAACGAGATATCAGAA                  | CTTCTGAATCTCGGTCAACTTG                      |                                         |
| SYBR Myd88                                          | CGTATGGCGAGGGTGTGTTTC                    | ATCCGCTCAATGCTCGTTTCC                       |                                         |
| SYBR Rel1A                                          | TGGTGGTGTGTCTGCGTAAC                     | CTGCTGGCGTGACCGTATCC                        |                                         |
| SYBR IMD                                            | ATCCGACATCTGGGATATG                      | GGGTGACTTTGTGCTGCTT                         |                                         |
| SYBR IKK2                                           | GCGGCCAGTGTATCATG                        | AGAGGCATCGAGGAATTCATCA                      |                                         |
| SYBR FADD                                           | AGTATCGAGCAACGTTAGAGG                    | AAGGTGCTCAATTGCGAC                          |                                         |
| SYBR Rel2                                           | TGGACATGCTCGATCTTTTCAA                   | CGACGACTCTACCAGATTGG                        |                                         |
| SYBR Dome                                           | AAACGGTGGCAAAATGAACT                     | CATACAGCCGGCTTCTTCT                         |                                         |
| SYBR Hop                                            | GCTGGTAGTAATGCTTCGAGTGAAT                | GCCGGTGTGTAATGACTAGAA                       |                                         |
| SYBR STAT                                           | CACACAAAAGGACGAAAGCA                     | TCCAGTTCCTCAAAGCTCA                         |                                         |
| SYBR Vago                                           | CAGTAGCATTGCGGTCAGA                      | CGATGTGGATCTAGCACTTC                        |                                         |
| SYBR DefC                                           | CTTTGTTGATGAACTCCGGAG                    | GAACCCACTCAGCAGATCGC                        |                                         |
| SYBR DefD                                           | GGCGTTGGTATAGTCTTG                       | CACACTTCTGGAGTTGAG                          |                                         |
| SYBR CecB                                           | GCTGAAGAAGCTGGGAAAAAAG                   | CTTCCCAGTCCCTTGATGCC                        |                                         |
| SYBR GAM                                            | GGTGTGTTTATGCCAAAACC                     | CGATGTAGCATTCGGTGATG                        |                                         |
| SYBR Duox1                                          | CACGTGGTGAATTCGAATG                      | GCCATGCCATCAGGAAGT                          |                                         |
| SYBR Duox2                                          | CGTGGCGAGTATTCAGT                        | GCAAAATCATAGCAACCAC                         |                                         |
| SYBR Noxm                                           | ATATCCGAGGCCAGTACGT                      | CTGTAACGGGTGCCACTCA                         |                                         |
| SYBR 16S rRNA for commensal bacteria                | TCCTACGGGAGGCAGCAGT                      | GGACTACAGGGTATCTAATCTGT                     |                                         |
| SYBR <i>Aedes albopictus</i> Actin                  | CGGAAGAGCACCCAGTTCTC                     | TGTGTCACTTCTCGCGGTAG                        |                                         |
| <b>The primers for Taqman RT-QPCR</b>               |                                          |                                             |                                         |
|                                                     | <b>Upper primer</b>                      | <b>Lower primer</b>                         | <b>Probe (for Taqman QPCR)</b>          |
| <i>DENV1 Envelope gene</i>                          | GCTGACATGGCTAGGATTAATTC                  | GGTACAGTGAACCATGCCAATG                      | FAM-CGCTCCCTTTCGATGACGTGC-TAMRA         |
| <i>DENV2 Envelope gene</i>                          | CATTCCAAAGTGGAATCTCTTGTC                 | CAGATCTCTGATGAATAACCAACG                    | FAM-ATGCTGAAACGGGAGAGAAACCGC-TAMRA      |
| <i>DENV3 Envelope gene</i>                          | GGGAAAACCGTCTATCAATA                     | CGCCATAACCAATTTTCATTGG                      | FAM-CACAGTTGGCGAAGAGATTCTCAAGAGGA-TAMRA |
| <i>JEV Envelope gene</i>                            | CTGTTCCATAGGGAGTGGTTTC                   | CTCCACGCTGTGCTCGAA                          | FAM-TGACCTCGCTCTCCCTGGACG-TAMRA         |
| <i>Aedes aegypti</i> Actin                          | GAACACCCAGTCTGCTGACA                     | TGCGTCACTTCTCAGGGTATG                       | FAM-AGGCCCCGCTCAACCCGAAG-TAMRA          |
| <i>Mouse Actin</i>                                  | AGCCATGTACGTAGCCATCCA                    | TCTCCGAGTCCATCACAATG                        | FAM-TGTCCCTGTATGCCTCTGGTCTACCAAC-TAMRA  |
